# Supplementary material for: MAPK and Notch‐Mediated Effects of Meso‐Xanthin F199 Compounds on Proliferative Activity and Apoptosis of Human Melanocytes in Three‐Dimensional Culture
Source: Hindawi journal article supplement (doi:10.1155/2021/8463161), 2021-01-01
Supplement: f1 [file 8463161.f1.pdf]

# SUPPLEMENTARY MATERIAL

## SYNERGETIC ACTION OF FUCOXANTHIN AND GROWTH FACTORS

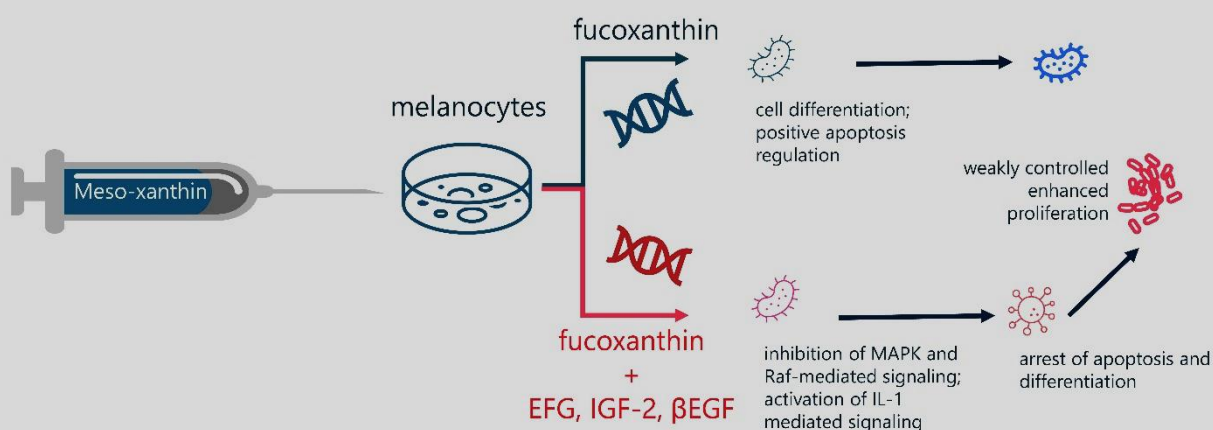

Data are represented as a complete proteome shared between assayed melanocytes cultured in monolayer (M2319) and in spheroids before (Nm01) and after (Am02) exposure to Meso-Xanthin F199™. Data content comprises of assigned genes attribution, proteins characterization according to the obtained proteomic analyzes and table of semi-quantitative distribution of the defined proteins (green color indicates the most abundant; red color indicates the least abundant proteins among analyzed cell cultures; semi-quantitative data are estimated in linear and logarithmic scales). Data availability link (in Mendeley Data Repository): <http://dx.doi.org/10.17632/nmrfymrrn.2>

RELATED TO "MAPK AND NOTCH-MEDIATED EFFECTS OF MESO-XANTHIN F199 COMPOUNDS ON PROLIFERATIVE ACTIVITY AND APOPTOSIS OF HUMAN MELANOCYTES IN THREE-DIMENSIONAL CULTURE".

IRINA N. SABURINA, IRINA M. ZURINA, NASTASIA V. KOSHELEVA, ANASTASIYA A. GORKUN, ELENA N. VOLKOVA, OLGA S. GRINAKOVSKAYA, ANTON S. RYBAKOV, ANNA L. KAYSHEVA, ARTHUR T. KOPYLOV, SERGEY G. MOROZOV

**Proteome Difference between 3D melanocytes before (Nm-01) and after (Am-02) exposure to Meso-Xanthin F199**

FOLDS CHANGE, LINEAR scale

| Main Accession | Description                                       | Gene  | Ensembl Gene ID | Chromosome  | GO Accession    | MW [kDa] | NM-01 | AM-02 | p-value  |
|----------------|---------------------------------------------------|-------|-----------------|-------------|-----------------|----------|-------|-------|----------|
| P31946         | 14-3-3 protein beta/alpha                         | 1433B | ENSG00000166913 | 20          | GO:0006461, GO: | 28.065   | 0.71  | 0.50  | 3.98E-05 |
| P62258         | 14-3-3 protein epsilon                            | 1433E | ENSG00000108953 | 17          | GO:0040011, GO: | 29.155   | 1.03  | 1.14  | 5.67E-04 |
| Q04917         | 14-3-3 protein eta                                | 1433F | ENSG00000128245 | 22          | GO:0009056, GO: | 28.201   | 2.65  | 1.53  | 2.95E-04 |
| P61981         | 14-3-3 protein gamma                              | 1433G | ENSG00000170027 | 7           | GO:0022607, GO: | 28.285   | 1.49  | 1.04  | 2.19E-04 |
| P27348         | 14-3-3 protein theta                              | 1433T | ENSG00000134308 | 2           | GO:0008150, GO: | 27.747   | 1.25  | 0.80  | 3.34E-05 |
| P63104         | 14-3-3 protein zeta/delta                         | 1433Z | ENSG00000164924 | 8           | GO:0022607, GO: | 27.728   | 1.48  | 1.19  | 1.17E-04 |
| P30153         | Serine/threonine-protein phosphatase 2A           | 2AAA  | ENSG00000105568 | 19          | GO:0007010, GO: | 65.267   | 0.92  | 0.70  | 2.36E-04 |
| Q13541         | Eukaryotic translation initiation factor 4E-b     | 4EBP1 | ENSG00000187840 | 8           | GO:0008150, GO: | 12.572   | 2.90  | 3.59  | 2.25E-05 |
| P21589         | 5'-nucleotidase                                   | 5NTD  | ENSG00000135318 | 6           |                 | 63.327   | 2.50  | 4.90  | 2.36E-04 |
| P52209         | 6-phosphogluconate dehydrogenase, decarboxylating | 6PGD  | ENSG00000142657 | 1           |                 | 53.106   | 0.84  | 0.63  | 4.15E-05 |
| P53396         | ATP-citrate synthase                              | ACLY  | ENSG00000131473 | 17          |                 | 120.762  | 0.59  | 0.80  | 9.15E-05 |
| P62736         | Actin, aortic smooth muscle                       | ACTA  | ENSG00000107796 | 10          |                 | 41.982   | 1.84  | 1.92  | 6.04E-05 |
| P60709         | Actin, cytoplasmic 1                              | ACTB  | ENSG00000075624 | 7           | GO:0007010, GO: | 41.710   | 1.13  | 1.09  | 2.18E-04 |
| Q562R1         | Beta-actin-like protein 2                         | ACTBL | ENSG00000169067 | 5           | GO:0008150, GO: | 41.976   | 0.93  | 1.01  | 7.81E-05 |
| P63261         | Actin, cytoplasmic 2                              | ACTG  | ENSG00000184009 | 17          | GO:0007010, GO: | 41.766   | 0.83  | 0.87  | 1.47E-04 |
| P12814         | Alpha-actinin-1                                   | ACTN1 | ENSG00000072110 | 14          |                 | 102.993  | 1.31  | 1.42  | 1.25E-04 |
| O43707         | Alpha-actinin-4                                   | ACTN4 | ENSG00000282844 | CHR_HG26_PA | GO:0007010, GO: | 104.788  | 1.03  | 1.23  | 1.61E-04 |
| P05141         | ADP/ATP translocase 2                             | ADT2  | ENSG00000005022 | X           |                 | 32.831   | 0.31  | 0.76  | 3.27E-03 |
| Q09666         | Neuroblast differentiation-associated protein 1   | AHNK  | ENSG00000124942 | 11          | GO:0008150, GO: | 628.699  | 2.95  | 5.53  | 3.55E-04 |
| P04075         | Fructose-bisphosphate aldolase A                  | ALDOA | ENSG00000149925 | 16          |                 | 39.395   | 0.38  | 0.27  | 1.71E-04 |
| P09972         | Fructose-bisphosphate aldolase C                  | ALDOC | ENSG00000109107 | 17          | GO:0009056, GO: | 39.431   | 0.72  | 0.83  | 5.41E-04 |
| P04083         | Annexin A1                                        | ANXA1 | ENSG00000135046 | 9           | GO:0016887, GO: | 38.690   | 1.18  | 1.52  | 7.49E-05 |
| P07355         | Annexin A2                                        | ANXA2 | ENSG00000182718 | 15          |                 | 38.580   | 1.49  | 2.17  | 9.62E-05 |
| P08758         | Annexin A5                                        | ANXA5 | ENSG00000164111 | 4           | GO:0008150, GO: | 35.914   | 1.00  | 1.13  | 1.14E-03 |
| P08133         | Annexin A6                                        | ANXA6 | ENSG00000197043 | 5           | GO:0008150, GO: | 75.826   | 1.82  | 1.66  | 4.06E-05 |
| P20073         | Annexin A7                                        | ANXA7 | ENSG00000138279 | 10          |                 | 52.706   | 3.39  | 1.20  | 3.78E-04 |
| O95782         | AP-2 complex subunit alpha-1                      | AP2A1 | ENSG00000196961 | 19          |                 | 107.478  | 5.14  | 3.59  | 6.05E-04 |
| P27695         | DNA- lyase                                        | APEX1 | ENSG00000100823 | 14          | GO:0040011, GO: | 35.532   | 0.74  | 0.78  | 6.24E-05 |
| P07741         | Adenine phosphoribosyltransferase                 | APT   | ENSG00000198931 | 16          | GO:0008150, GO: | 19.595   | 2.90  | 1.20  | 1.39E-04 |
| O15143         | Actin-related protein 2/3 complex subunit 1       | ARC1B | ENSG00000130429 | 7           | GO:0008150, GO: | 40.923   | 1.04  | 1.26  | 9.87E-05 |
| P61204         | ADP-ribosylation factor 3                         | ARF3  | ENSG00000134287 | 12          |                 | 20.588   | 0.76  | 0.90  | 1.37E-04 |
| P18085         | ADP-ribosylation factor 4                         | ARF4  | ENSG00000168374 | 3           | GO:0040011, GO: | 20.498   | 1.72  | 2.03  | 2.12E-05 |
| P40616         | ADP-ribosylation factor-like protein 1            | ARL1  | ENSG00000120805 | 12          |                 | 20.404   | 0.39  | 1.20  | 4.06E-05 |
| P61160         | Actin-related protein 2                           | ARP2  | ENSG00000138071 | 2           |                 | 44.732   | 1.74  | 1.02  | 4.67E-05 |
| P61158         | Actin-related protein 3                           | ARP3  | ENSG00000115091 | 2           | GO:0007010, GO: | 47.341   | 1.05  | 1.50  | 2.07E-05 |
| O15144         | Actin-related protein 2/3 complex subunit 2       | ARPC2 | ENSG00000163466 | 2           | GO:0007010, GO: | 34.311   | 4.27  | 1.20  | 1.25E-04 |
| O15145         | Actin-related protein 2/3 complex subunit 3       | ARPC3 | ENSG00000111229 | 12          | GO:0008150, GO: | 20.533   | 2.70  | 1.03  | 1.34E-04 |

|        |                                                    |       |                 |                |    |                 |         |      |      |          |
|--------|----------------------------------------------------|-------|-----------------|----------------|----|-----------------|---------|------|------|----------|
| P59998 | Actin-related protein 2/3 complex subunit 4        | ARPC4 | ENSG00000241553 |                | 3  |                 | 19.654  | 0.79 | 0.52 | 5.45E-05 |
| Q12797 | Aspartyl/asparaginyl beta-hydroxylase              | ASPH  | ENSG00000198363 |                | 8  |                 | 85.809  | 0.43 | 1.00 | 0.00E+00 |
| P05023 | Sodium/potassium-transporting ATPase subunit alpha | AT1A1 | ENSG00000163399 |                | 1  |                 | 112.824 | 0.50 | 1.36 | 1.79E-04 |
| P25705 | ATP synthase subunit alpha, mitochondrial          | ATPA  |                 |                |    |                 | 59.714  | 0.54 | 0.34 | 2.08E-04 |
| P06576 | ATP synthase subunit beta, mitochondrial           | ATPB  |                 |                |    | GO:0016887, GO: | 56.525  | 0.64 | 0.54 | 8.93E-05 |
| P51572 | B-cell receptor-associated protein 31              | BAP31 | ENSG00000185825 | X              |    |                 | 27.974  | 0.50 | 0.54 | 1.41E-05 |
| P80723 | Brain acid soluble protein 1                       | BASP1 | ENSG00000176788 |                | 5  |                 | 22.680  | 3.46 | 5.35 | 6.45E-05 |
| P11021 | Endoplasmic reticulum chaperone BiP                | BIP   | ENSG00000044574 |                | 9  | GO:0016887, GO: | 72.288  | 0.99 | 1.95 | 2.22E-04 |
| Q07021 | Complement component 1 Q subcomponent 1            | C1QBP | ENSG00000108561 |                | 17 | GO:0040011, GO: | 31.343  | 0.19 | 0.48 | 1.25E-04 |
| P0DP23 | Calmodulin-1                                       | CALM1 | ENSG00000198668 |                | 14 |                 | 16.827  | 0.95 | 1.50 | 2.71E-05 |
| P27797 | Calreticulin                                       | CALR  | ENSG00000179218 |                | 19 | GO:0007010, GO: | 48.112  | 0.68 | 0.72 | 1.10E-04 |
| O43852 | Calumenin                                          | CALU  | ENSG00000128595 |                | 7  |                 | 37.084  | 1.32 | 2.25 | 1.57E-04 |
| P27824 | Calnexin                                           | CALX  | ENSG00000283777 | CHR_HG30_PATCH |    |                 | 67.526  | 0.95 | 1.37 | 5.01E-05 |
| P17655 | Calpain-2 catalytic subunit                        | CAN2  | ENSG00000162909 |                | 1  |                 | 79.945  | 1.34 | 0.94 | 2.06E-04 |
| Q01518 | Adenylyl cyclase-associated protein 1              | CAP1  | ENSG00000131236 |                | 1  | GO:0007010, GO: | 51.869  | 1.26 | 1.45 | 2.39E-04 |
| P40121 | Macrophage-capping protein                         | CAPG  | ENSG00000042493 |                | 2  |                 | 38.474  | 2.32 | 1.79 | 4.35E-05 |
| P47756 | F-actin-capping protein subunit beta               | CAPZB | ENSG00000077549 |                | 1  |                 | 31.331  | 1.26 | 1.09 | 1.88E-04 |
| P07858 | Cathepsin B                                        | CATB  | ENSG00000164733 |                | 8  | GO:0009056, GO: | 37.797  | 0.96 | 0.57 | 1.49E-05 |
| P07339 | Cathepsin D                                        | CATD  | ENSG00000117984 |                | 11 | GO:0008150, GO: | 44.524  | 1.03 | 0.82 | 8.15E-05 |
| Q03135 | Caveolin-1                                         | CAV1  | ENSG00000105974 |                | 7  | GO:0022607, GO: | 20.458  | 5.32 | 6.18 | 1.71E-04 |
| Q6NZI2 | Caveolae-associated protein 1                      | CAVN1 | ENSG00000177469 |                | 17 | GO:0008150, GO: | 43.450  | 1.82 | 3.56 | 3.52E-05 |
| P52907 | F-actin-capping protein subunit alpha-1            | CAZA1 | ENSG00000116489 |                | 1  | GO:0008150, GO: | 32.902  | 1.23 | 0.73 | 3.01E-05 |
| P13987 | CD59 glycoprotein                                  | CD59  | ENSG00000085063 |                | 11 |                 | 14.168  | 2.26 | 2.19 | 5.34E-05 |
| Q16543 | Hsp90 co-chaperone Cdc37                           | CDC37 | ENSG00000105401 |                | 19 | GO:0009056, GO: | 44.440  | 1.62 | 1.28 | 1.71E-04 |
| P60953 | Cell division control protein 42 homolog           | CDC42 | ENSG00000070831 |                | 1  | GO:0007010, GO: | 21.245  | 2.14 | 5.78 | 7.20E-05 |
| P10809 | 60 kDa heat shock protein, mitochondrial           | CH60  | ENSG00000144381 |                | 2  | GO:0008283, GO: | 61.016  | 1.47 | 2.08 | 2.05E-05 |
| O75390 | Citrate synthase, mitochondrial                    | CISY  | ENSG00000062485 |                | 12 | GO:0008150, GO: | 51.680  | 0.57 | 0.14 | 6.85E-05 |
| Q07065 | Cytoskeleton-associated protein 4                  | CKAP4 | ENSG00000136026 |                | 12 | GO:0008150, GO: | 65.983  | 0.95 | 0.66 | 3.26E-04 |
| Q00610 | Clathrin heavy chain 1                             | CLH1  | ENSG00000141367 |                | 17 |                 | 191.493 | 0.98 | 0.99 | 1.64E-04 |
| O00299 | Chloride intracellular channel protein 1           | CLIC1 | ENSG00000226248 | CHR_HSCHR6_I   |    | GO:0008150, GO: | 26.906  | 0.85 | 0.97 | 2.04E-04 |
| Q9Y696 | Chloride intracellular channel protein 4           | CLIC4 | ENSG00000169504 |                | 1  | GO:0007010, GO: | 28.754  | 1.57 | 1.00 | 5.50E-05 |
| Q15417 | Calponin-3                                         | CNN3  | ENSG00000117519 |                | 1  |                 | 36.391  | 0.50 | 1.00 | 3.26E-04 |
| P08123 | Collagen alpha-2 chain                             | CO1A2 | ENSG00000164692 |                | 7  | GO:0009056, GO: | 129.235 | 3.40 | 1.15 | 2.22E-05 |
| P23528 | Cofilin-1                                          | COF1  | ENSG00000172757 |                | 11 | GO:0009790, GO: | 18.491  | 1.32 | 1.39 | 6.30E-04 |
| P53621 | Coatamer subunit alpha                             | COPA  | ENSG00000122218 |                | 1  |                 | 138.258 | 0.97 | 3.59 | 1.57E-04 |
| P53618 | Coatamer subunit beta                              | COPB  | ENSG00000129083 |                | 11 | GO:0008150, GO: | 107.074 | 1.13 | 0.40 | 2.13E-05 |
| P35606 | Coatamer subunit beta'                             | COPB2 | ENSG00000184432 |                | 3  |                 | 102.422 | 1.03 | 0.87 | 2.22E-05 |
| P48444 | Coatamer subunit delta                             | COPD  | ENSG00000095139 |                | 11 | GO:0008150, GO: | 57.174  | 1.19 | 1.43 | 3.78E-04 |
| Q9Y678 | Coatamer subunit gamma-1                           | COPG1 | ENSG00000181789 |                | 3  | GO:0008150, GO: | 97.655  | 0.53 | 0.82 | 1.75E-04 |
| Q9ULV4 | Coronin-1C                                         | COR1C | ENSG00000110880 |                | 12 |                 | 53.215  | 1.81 | 0.75 | 1.71E-04 |
| Q14019 | Coactosin-like protein                             | COTL1 | ENSG00000103187 |                | 16 | GO:0008150, GO: | 15.935  | 0.88 | 0.82 | 2.44E-04 |
| P04632 | Calpain small subunit 1                            | CPNS1 | ENSG00000126247 |                | 19 | GO:0008283, GO: | 28.298  | 1.31 | 1.84 | 2.14E-04 |
| P21291 | Cysteine and glycine-rich protein 1                | CSRP1 | ENSG00000159176 |                | 1  | GO:0008150, GO: | 20.554  | 1.01 | 0.55 | 3.17E-05 |
| Q9UJU6 | Drebrin-like protein                               | DBNL  | ENSG00000136279 |                | 7  |                 | 48.178  | 0.82 | 1.10 | 9.87E-05 |

|        |                                                                |       |                 |                      |    |                 |         |      |      |          |
|--------|----------------------------------------------------------------|-------|-----------------|----------------------|----|-----------------|---------|------|------|----------|
| Q14203 | Dynactin subunit 1                                             | DCTN1 | ENSG00000204843 |                      | 2  |                 | 141.607 | 0.64 | 0.20 | 8.15E-05 |
| Q92499 | ATP-dependent RNA helicase DDX1                                | DDX1  | ENSG00000079785 |                      | 2  |                 | 82.380  | 5.08 | 0.60 | 1.78E-04 |
| O00571 | ATP-dependent RNA helicase DDX3X                               | DDX3X | ENSG00000215301 | X                    |    |                 | 73.198  | 0.62 | 1.19 | 2.01E-04 |
| P60981 | Destrin                                                        | DEST  | ENSG00000125868 |                      | 20 | GO:0005623, GO: | 18.493  | 1.90 | 2.74 | 1.04E-03 |
| Q08211 | ATP-dependent RNA helicase A                                   | DHX9  | ENSG00000135829 |                      | 1  | GO:0016887, GO: | 140.869 | 1.06 | 0.98 | 4.15E-05 |
| Q8TF09 | Dynein light chain roadblock-type 2                            | DLRB2 | ENSG00000168589 |                      | 16 |                 | 10.848  | 0.73 | 1.79 | 1.62E-03 |
| Q16555 | Dihydropyrimidinase-related protein 2                          | DPYL2 | ENSG00000092964 |                      | 8  |                 | 62.255  | 1.65 | 0.71 | 9.87E-05 |
| Q16643 | Drebrin                                                        | DREB  | ENSG00000113758 |                      | 5  |                 | 71.385  | 3.36 | 2.19 | 2.25E-05 |
| O00148 | ATP-dependent RNA helicase DDX39A                              | DX39A | ENSG00000123136 |                      | 19 |                 | 49.098  | 0.79 | 0.29 | 6.30E-04 |
| Q14204 | Cytoplasmic dynein 1 heavy chain 1                             | DYHC1 | ENSG00000197102 |                      | 14 | GO:0016887, GO: | 532.072 | 2.27 | 2.59 | 8.52E-05 |
| P68104 | Elongation factor 1-alpha 1                                    | EF1A1 | ENSG00000156508 |                      | 6  |                 | 50.109  | 0.96 | 2.16 | 1.25E-04 |
| P24534 | Elongation factor 1-beta                                       | EF1B  | ENSG00000283391 | CHR_HSCHR2_4         |    | GO:0008150, GO: | 24.748  | 0.77 | 1.71 | 5.67E-05 |
| P29692 | Elongation factor 1-delta                                      | EF1D  | ENSG00000273594 | CHR_HSCHR8_3_CTG7    |    |                 | 31.103  | 1.28 | 1.09 | 1.39E-04 |
| P26641 | Elongation factor 1-gamma                                      | EF1G  | ENSG00000254772 |                      | 11 | GO:0008150, GO: | 50.087  | 1.07 | 1.13 | 6.31E-05 |
| P13639 | Elongation factor 2                                            | EF2   | ENSG00000167658 |                      | 19 | GO:0008283, GO: | 95.277  | 1.16 | 1.31 | 2.07E-05 |
| Q9NZN4 | EH domain-containing protein 2                                 | EHD2  | ENSG00000024422 |                      | 19 | GO:0061024, GO: | 61.123  | 0.68 | 1.44 | 3.11E-05 |
| Q14152 | Eukaryotic translation initiation factor 3 subunit 1           | EIF3A | ENSG00000107581 |                      | 10 |                 | 166.468 | 1.21 | 1.20 | 5.34E-05 |
| P55884 | Eukaryotic translation initiation factor 3 subunit 2           | EIF3B | ENSG00000106263 |                      | 7  |                 | 92.424  | 1.77 | 1.79 | 3.86E-04 |
| P60228 | Eukaryotic translation initiation factor 3 subunit 3           | EIF3E | ENSG00000104408 |                      | 8  | GO:0008150, GO: | 52.187  | 1.76 | 1.52 | 8.47E-04 |
| Q15370 | Elongin-B                                                      | ELOB  | ENSG00000103363 |                      | 16 |                 | 13.125  | 0.50 | 0.55 | 9.38E-05 |
| P50402 | Emerin                                                         | EMD   | ENSG00000102119 | X                    |    | GO:0008283, GO: | 28.976  | 3.39 | 2.39 | 6.93E-05 |
| P06733 | Alpha-enolase                                                  | ENOA  | ENSG00000074800 |                      | 1  | GO:0009056, GO: | 47.139  | 0.73 | 0.90 | 6.24E-05 |
| P14625 | Endoplasmic reticulum chaperone protein 78                     | ENPL  | ENSG00000166598 |                      | 12 | GO:0007010, GO: | 92.411  | 1.01 | 0.83 | 3.78E-04 |
| Q969X5 | Endoplasmic reticulum-Golgi intermediate compartment protein 1 | ERG11 | ENSG00000113719 |                      | 5  |                 | 32.571  | 1.13 | 0.66 | 1.22E-04 |
| P30040 | Endoplasmic reticulum resident protein 29                      | ERP29 | ENSG00000089248 |                      | 12 | GO:0008150, GO: | 28.975  | 0.77 | 0.78 | 4.15E-05 |
| Q01844 | RNA-binding protein EWS                                        | EWS   | ENSG00000182944 |                      | 22 |                 | 68.436  | 0.97 | 0.60 | 1.71E-04 |
| P49327 | Fatty acid synthase                                            | FAS   | ENSG00000169710 |                      | 17 | GO:0016746, GO: | 273.254 | 1.39 | 1.49 | 3.81E-05 |
| P02765 | Alpha-2-HS-glycoprotein                                        | FETUA | ENSG00000145192 |                      | 3  | GO:0008150, GO: | 39.316  | 1.61 | 0.64 | 1.65E-04 |
| Q9Y3D6 | Mitochondrial fission 1 protein                                | FIS1  | ENSG00000214253 |                      | 7  | GO:0006461, GO: | 16.927  | 0.77 | 1.20 | 4.01E-04 |
| Q96AY3 | Peptidyl-prolyl cis-trans isomerase FKBP1                      | FKB10 | ENSG00000141756 |                      | 17 | GO:0008150, GO: | 64.204  | 0.72 | 1.56 | 6.94E-04 |
| P62942 | Peptidyl-prolyl cis-trans isomerase FKBP1                      | FKB1A | ENSG00000088832 |                      | 20 | GO:0006461, GO: | 11.943  | 0.24 | 0.90 | 2.81E-04 |
| P26885 | Peptidyl-prolyl cis-trans isomerase FKBP2                      | FKBP2 | ENSG00000173486 |                      | 11 | GO:0005623, GO: | 15.639  | 1.45 | 1.20 | 9.07E-05 |
| O95302 | Peptidyl-prolyl cis-trans isomerase FKBP9                      | FKBP9 | ENSG00000122642 |                      | 7  |                 | 63.044  | 1.03 | 0.43 | 4.79E-05 |
| P21333 | Filamin-A                                                      | FLNA  | ENSG00000196924 | X                    |    |                 | 280.564 | 1.01 | 1.54 | 4.51E-04 |
| O75369 | Filamin-B                                                      | FLNB  | ENSG00000136068 |                      | 3  |                 | 277.990 | 1.61 | 1.17 | 6.24E-05 |
| Q14315 | Filamin-C                                                      | FLNC  | ENSG00000128591 |                      | 7  |                 | 290.841 | 0.91 | 1.34 | 3.77E-05 |
| Q16658 | Fascin                                                         | FSCN1 | ENSG00000075618 |                      | 7  | GO:0008283, GO: | 54.496  | 1.03 | 0.88 | 1.04E-04 |
| Q13283 | Ras GTPase-activating protein-binding protein 1                | G3BP1 | ENSG00000145907 |                      | 5  | GO:0016887, GO: | 52.132  | 0.92 | 1.00 | 1.71E-04 |
| P04406 | Glyceraldehyde-3-phosphate dehydrogenase A                     | G3P   | ENSG00000111640 |                      | 12 | GO:0007010, GO: | 36.030  | 1.00 | 1.04 | 6.93E-05 |
| P11413 | Glucose-6-phosphate 1-dehydrogenase                            | G6PD  | ENSG00000160211 | X                    |    |                 | 59.219  | 3.39 | 1.37 | 4.73E-04 |
| P06744 | Glucose-6-phosphate isomerase                                  | G6PI  | ENSG00000282019 | CHR_HSCHR19_2_CTG3_1 |    |                 | 63.107  | 0.68 | 0.81 | 4.30E-04 |
| Q14697 | Neutral alpha-glucosidase AB                                   | GANAB | ENSG00000089597 |                      | 11 |                 | 106.807 | 1.33 | 0.86 | 4.79E-05 |
| P41250 | Glycine--tRNA ligase                                           | GARS  | ENSG00000106105 |                      | 7  | GO:0008150, GO: | 83.113  | 2.18 | 2.63 | 4.79E-05 |
| P62873 | Guanine nucleotide-binding protein G/G13                       | GGB1  | ENSG00000078369 |                      | 1  |                 | 37.353  | 1.30 | 0.80 | 1.10E-04 |

|        |                                               |       |                 |                         |    |                 |         |      |      |          |
|--------|-----------------------------------------------|-------|-----------------|-------------------------|----|-----------------|---------|------|------|----------|
| Q9UBI6 | Guanine nucleotide-binding protein G/G/G      | GBG12 | ENSG00000172380 |                         | 1  | GO:0008150, GO: | 8.001   | 1.29 | 2.73 | 2.00E-04 |
| P50395 | Rab GDP dissociation inhibitor beta           | GDIB  | ENSG00000057608 |                         | 10 | GO:0061024, GO: | 50.631  | 1.19 | 1.29 | 4.45E-05 |
| P52565 | Rho GDP-dissociation inhibitor 1              | GDIR1 | ENSG00000141522 |                         | 17 | GO:0008150, GO: | 23.193  | 1.27 | 0.66 | 4.92E-05 |
| P06396 | Gelsolin                                      | GELS  | ENSG00000148180 |                         | 9  |                 | 85.644  | 0.74 | 0.51 | 1.34E-04 |
| Q04446 | 1,4-alpha-glucan-branching enzyme             | GLGB  | ENSG00000114480 |                         | 3  | GO:0008150, GO: | 80.423  | 0.37 | 0.55 | 8.24E-05 |
| P35754 | Glutaredoxin-1                                | GLRX1 | ENSG00000173221 |                         | 5  | GO:0008150, GO: | 11.768  | 0.28 | 0.17 | 6.45E-05 |
| P14314 | Glucosidase 2 subunit beta                    | GLU2B | ENSG00000130175 |                         | 19 |                 | 59.388  | 0.77 | 0.84 | 4.62E-05 |
| P04899 | Guanine nucleotide-binding protein G sub      | GNAI2 | ENSG00000114353 |                         | 3  |                 | 40.425  | 5.32 | 4.78 | 4.79E-05 |
| P38646 | Stress-70 protein, mitochondrial              | GRP75 | ENSG00000113013 |                         | 5  | GO:0008150, GO: | 73.635  | 0.92 | 0.79 | 4.25E-05 |
| P78417 | Glutathione S-transferase omega-1             | GSTO1 | ENSG00000148834 |                         | 10 |                 | 27.548  | 1.25 | 1.20 | 7.49E-05 |
| P09211 | Glutathione S-transferase P                   | GSTP1 | ENSG00000084207 |                         | 11 | GO:0008283, GO: | 23.341  | 0.68 | 0.69 | 6.19E-04 |
| Q8NBJ5 | Procollagen galactosyltransferase 1           | GT251 | ENSG00000130309 |                         | 19 | GO:0005623, GO: | 71.590  | 1.36 | 1.43 | 1.57E-04 |
| P16401 | Histone H1.5                                  | H15   | ENSG00000184357 |                         | 6  | GO:0008150, GO: | 22.566  | 0.85 | 0.68 | 2.72E-04 |
| P04908 | Histone H2A type 1-B/E                        | H2A1B | ENSG00000278463 |                         | 6  |                 | 14.127  | 1.23 | 0.10 | 2.70E-04 |
| O60814 | Histone H2B type 1-K                          | H2B1K | ENSG00000197903 |                         | 6  |                 | 13.882  | 0.79 | 0.73 | 4.67E-05 |
| P68431 | Histone H3.1                                  | H31   | ENSG00000275714 |                         | 6  |                 | 15.394  | 0.17 | 0.21 | 1.13E-04 |
| P62805 | Histone H4                                    | H4    | ENSG00000278637 |                         | 6  | GO:0006461, GO: | 11.360  | 0.98 | 1.18 | 1.02E-03 |
| Q9NRV9 | Heme-binding protein 1                        | HEBP1 | ENSG00000013583 |                         | 12 | GO:0008150, GO: | 21.084  | 0.41 | 0.35 | 2.63E-05 |
| P09429 | High mobility group protein B1                | HMGB1 | ENSG00000189403 |                         | 13 |                 | 24.878  | 1.11 | 0.69 | 1.69E-03 |
| O14979 | Heterogeneous nuclear ribonucleoprotein       | HNRDL | ENSG00000152795 |                         | 4  |                 | 46.409  | 0.78 | 0.58 | 2.87E-05 |
| P31943 | Heterogeneous nuclear ribonucleoprotein       | HNRH1 | ENSG00000169045 |                         | 5  | GO:0008150, GO: | 49.198  | 0.68 | 2.21 | 3.28E-05 |
| P55795 | Heterogeneous nuclear ribonucleoprotein       | HNRH2 | ENSG00000126945 | X                       |    | GO:0008150, GO: | 49.232  | 0.37 | 0.31 | 3.29E-04 |
| P07910 | Heterogeneous nuclear ribonucleoproteins      | HNRPC | ENSG00000092199 |                         | 14 |                 | 33.650  | 0.98 | 0.62 | 8.52E-04 |
| P61978 | Heterogeneous nuclear ribonucleoprotein       | HNRPK | ENSG00000165119 |                         | 9  |                 | 50.944  | 0.64 | 0.41 | 3.15E-04 |
| P14866 | Heterogeneous nuclear ribonucleoprotein       | HNRPL | ENSG00000282947 | CHR_HG26_PA1            |    | GO:0008150, GO: | 64.092  | 0.84 | 0.43 | 4.92E-05 |
| P52272 | Heterogeneous nuclear ribonucleoprotein       | HNRPM | ENSG00000099783 |                         | 19 |                 | 77.464  | 2.62 | 1.45 | 1.45E-04 |
| O60506 | Heterogeneous nuclear ribonucleoprotein       | HNRPQ | ENSG00000135316 |                         | 6  |                 | 69.560  | 1.13 | 0.91 | 7.70E-04 |
| Q00839 | Heterogeneous nuclear ribonucleoprotein       | HNRPU | ENSG00000153187 |                         | 1  |                 | 90.528  | 0.91 | 0.50 | 5.16E-04 |
| P0DMV8 | Heat shock 70 kDa protein 1A                  | HS71A | ENSG00000235941 | CHR_HSCHR6_MHC_APD_CTG1 |    |                 | 70.009  | 0.94 | 0.87 | 4.35E-05 |
| P07900 | Heat shock protein HSP 90-alpha               | HS90A | ENSG00000080824 |                         | 14 |                 | 84.607  | 0.52 | 0.60 | 8.83E-04 |
| P08238 | Heat shock protein HSP 90-beta                | HS90B | ENSG00000096384 |                         | 6  | GO:0009056, GO: | 83.212  | 0.57 | 0.68 | 3.15E-04 |
| P34932 | Heat shock 70 kDa protein 4                   | HSP74 | ENSG00000170606 |                         | 5  | GO:0008150, GO: | 94.271  | 1.25 | 0.90 | 2.68E-05 |
| P11142 | Heat shock cognate 71 kDa protein             | HSP7C | ENSG00000109971 |                         | 11 | GO:0016887, GO: | 70.854  | 0.73 | 0.98 | 3.89E-05 |
| P04792 | Heat shock protein beta-1                     | HSPB1 | ENSG00000106211 |                         | 7  | GO:0009056, GO: | 22.768  | 1.48 | 2.34 | 6.57E-04 |
| P05198 | Eukaryotic translation initiation factor 2 su | IF2A  | ENSG00000134001 |                         | 14 | GO:0008150, GO: | 36.089  | 0.48 | 0.30 | 6.33E-03 |
| P60842 | Eukaryotic initiation factor 4A-I             | IF4A1 | ENSG00000161960 |                         | 17 | GO:0016887, GO: | 46.125  | 0.60 | 0.69 | 3.04E-04 |
| Q04637 | Eukaryotic translation initiation factor 4 ga | IF4G1 | ENSG00000114867 |                         | 3  |                 | 175.382 | 5.20 | 8.31 | 5.64E-07 |
| Q15056 | Eukaryotic translation initiation factor 4H   | IF4H  | ENSG00000106682 |                         | 7  |                 | 27.368  | 1.06 | 1.04 | 2.29E-05 |
| P63241 | Eukaryotic translation initiation factor 5A-1 | IF5A1 | ENSG00000132507 |                         | 17 |                 | 16.821  | 1.02 | 1.57 | 1.33E-04 |
| Q12906 | Interleukin enhancer-binding factor 3         | ILF3  | ENSG00000129351 |                         | 19 |                 | 95.279  | 0.38 | 0.78 | 1.06E-04 |
| Q14974 | Importin subunit beta-1                       | IMB1  | ENSG00000108424 |                         | 17 | GO:0007010, GO: | 97.108  | 1.50 | 1.52 | 0.00E+00 |
| O00410 | Importin-5                                    | IPO5  | ENSG00000065150 |                         | 13 |                 | 123.550 | 1.42 | 0.95 | 2.70E-04 |
| Q15181 | Inorganic pyrophosphatase                     | IPYR  | ENSG00000180817 |                         | 10 | GO:0008150, GO: | 32.639  | 1.76 | 1.25 | 1.10E-04 |
| P46940 | Ras GTPase-activating-like protein IQGA       | IQGA1 | ENSG00000140575 |                         | 15 | GO:0040011, GO: | 189.134 | 2.33 | 2.68 | 3.34E-04 |

|        |                                                     |       |                 |   |    |                 |         |      |      |          |
|--------|-----------------------------------------------------|-------|-----------------|---|----|-----------------|---------|------|------|----------|
| P05556 | Integrin beta-1                                     | ITB1  | ENSG00000150093 |   | 10 | GO:0009790, GO: | 88.357  | 1.93 | 1.79 | 5.52E-04 |
| P00568 | Adenylate kinase isoenzyme 1                        | KAD1  | ENSG00000106992 |   | 9  | GO:0008150, GO: | 21.621  | 2.26 | 1.33 | 1.78E-04 |
| P54819 | Adenylate kinase 2, mitochondrial                   | KAD2  | ENSG00000004455 |   | 1  |                 | 26.461  | 0.74 | 1.08 | 2.14E-05 |
| P30085 | UMP-CMP kinase                                      | KCY   | ENSG00000162368 |   | 1  |                 | 22.208  | 0.85 | 0.97 | 1.71E-04 |
| Q07866 | Kinesin light chain 1                               | KLC1  | ENSG00000126214 |   | 14 |                 | 65.269  | 1.16 | 2.69 | 3.17E-05 |
| P14618 | Pyruvate kinase PKM                                 | KPYM  | ENSG00000067225 |   | 15 |                 | 57.900  | 0.83 | 0.42 | 9.51E-06 |
| P11279 | Lysosome-associated membrane glycoprotein 1         | LAMP1 | ENSG00000185896 |   | 13 |                 | 44.854  | 1.98 | 0.98 | 1.19E-04 |
| P13473 | Lysosome-associated membrane glycoprotein 2         | LAMP2 | ENSG00000005893 | X |    |                 | 44.932  | 1.29 | 0.89 | 4.30E-05 |
| P00338 | L-lactate dehydrogenase A chain                     | LDHA  | ENSG00000134333 |   | 11 |                 | 36.665  | 0.88 | 0.41 | 1.21E-04 |
| P07195 | L-lactate dehydrogenase B chain                     | LDHB  | ENSG00000111716 |   | 12 | GO:0008150, GO: | 36.615  | 0.85 | 0.40 | 8.15E-05 |
| P09382 | Galectin-1                                          | LEG1  | ENSG00000100097 |   | 22 | GO:0006464, GO: | 14.706  | 1.53 | 1.10 | 6.63E-04 |
| Q04760 | Lactoylglutathione lyase                            | LGUL  | ENSG00000124767 |   | 6  |                 | 20.764  | 1.42 | 0.28 | 2.81E-04 |
| P02545 | Prelamin-A/C                                        | LMNA  | ENSG00000160789 |   | 1  |                 | 74.095  | 1.75 | 0.92 | 2.16E-04 |
| Q96AG4 | Leucine-rich repeat-containing protein 59           | LRC59 | ENSG00000108829 |   | 17 | GO:0005635, GO: | 34.909  | 1.07 | 1.70 | 2.97E-05 |
| O43504 | Ragulator complex protein LAMTOR5                   | LTOR5 | ENSG00000134248 |   | 1  | GO:0008150, GO: | 9.608   | 0.64 | 1.59 | 9.54E-05 |
| P46821 | Microtubule-associated protein 1B                   | MAP1B | ENSG00000131711 |   | 5  | GO:0008150, GO: | 270.468 | 5.63 | 4.32 | 8.93E-05 |
| P27816 | Microtubule-associated protein 4                    | MAP4  | ENSG00000047849 |   | 3  |                 | 120.930 | 1.20 | 0.65 | 6.01E-04 |
| P29966 | Myristoylated alanine-rich C-kinase substrate       | MARCS | ENSG00000277443 |   | 6  | GO:0008150, GO: | 31.536  | 0.79 | 0.54 | 1.19E-05 |
| P43243 | Matrin-3                                            | MATR3 | ENSG00000015479 |   | 5  | GO:0005635, GO: | 94.565  | 0.53 | 0.33 | 4.15E-05 |
| P40925 | Malate dehydrogenase, cytoplasmic                   | MDHC  | ENSG00000014641 |   | 2  |                 | 36.403  | 0.88 | 0.69 | 1.04E-04 |
| P40926 | Malate dehydrogenase, mitochondrial                 | MDHM  | ENSG00000146701 |   | 7  | GO:0008150, GO: | 35.481  | 0.58 | 0.58 | 3.81E-05 |
| P14174 | Macrophage migration inhibitory factor              | MIF   | ENSG00000240972 |   | 22 | GO:0008283, GO: | 12.468  | 0.54 | 0.22 | 5.87E-04 |
| P19105 | Myosin regulatory light chain 12A                   | ML12A | ENSG00000101608 |   | 18 | GO:0008150, GO: | 19.781  | 1.53 | 1.57 | 5.30E-04 |
| O14950 | Myosin regulatory light chain 12B                   | ML12B | ENSG00000118680 |   | 18 | GO:0008150, GO: | 19.767  | 1.32 | 1.37 | 1.34E-04 |
| P26038 | Moesin                                              | MOES  | ENSG00000147065 | X |    | GO:0008283, GO: | 67.778  | 0.74 | 0.90 | 1.50E-04 |
| Q00325 | Phosphate carrier protein, mitochondrial            | MPCP  | ENSG00000075415 |   | 12 |                 | 40.069  | 0.79 | 0.30 | 8.93E-05 |
| Q14764 | Major vault protein                                 | MVP   | ENSG00000013364 |   | 16 | GO:0008150, GO: | 99.266  | 0.72 | 0.56 | 1.39E-04 |
| Q969H8 | Myeloid-derived growth factor                       | MYDGF | ENSG00000074842 |   | 19 | GO:0008283, GO: | 18.783  | 0.69 | 1.71 | 9.93E-04 |
| P35580 | Myosin-10                                           | MYH10 | ENSG00000133026 |   | 17 |                 | 228.858 | 1.76 | 0.93 | 2.83E-05 |
| Q7Z406 | Myosin-14                                           | MYH14 | ENSG00000105357 |   | 19 |                 | 227.732 | 1.51 | 0.92 | 2.05E-04 |
| P35579 | Myosin-9                                            | MYH9  | ENSG00000100345 |   | 22 | GO:0016887, GO: | 226.392 | 1.29 | 0.92 | 1.28E-04 |
| P60660 | Myosin light polypeptide 6                          | MYL6  | ENSG00000092841 |   | 12 |                 | 16.919  | 1.49 | 1.29 | 2.17E-04 |
| O00159 | Unconventional myosin-Ic                            | MYO1C | ENSG00000197879 |   | 17 |                 | 121.606 | 2.18 | 1.49 | 5.67E-04 |
| E9PAV3 | Nascent polypeptide-associated complex              | NACAM | ENSG00000196531 |   | 12 |                 | 205.295 | 1.93 | 1.79 | 2.60E-04 |
| P43490 | Nicotinamide phosphoribosyltransferase              | NAMPT | ENSG00000105835 |   | 7  | GO:0008283, GO: | 55.487  | 0.62 | 0.11 | 1.57E-04 |
| P00387 | NADH-cytochrome b5 reductase 3                      | NB5R3 | ENSG00000100243 |   | 22 |                 | 34.213  | 3.25 | 3.92 | 9.38E-05 |
| P15531 | Nucleoside diphosphate kinase A                     | NDKA  | ENSG00000239672 |   | 17 |                 | 17.138  | 3.08 | 1.32 | 1.66E-04 |
| P22392 | Nucleoside diphosphate kinase B                     | NDKB  | ENSG00000243678 |   | 17 |                 | 17.287  | 2.76 | 2.40 | 4.06E-04 |
| Q92597 | Protein NDRG1                                       | NDRG1 | ENSG00000104419 |   | 8  | GO:0008283, GO: | 42.808  | 3.87 | 3.59 | 1.62E-03 |
| P40261 | Nicotinamide N-methyltransferase                    | NNMT  | ENSG00000166741 |   | 11 | GO:0008150, GO: | 29.555  | 0.55 | 0.64 | 1.49E-04 |
| Q15233 | Non-POU domain-containing octamer-binding protein 1 | NONO  | ENSG00000147140 | X |    | GO:0008150, GO: | 54.197  | 0.54 | 0.56 | 2.70E-04 |
| P55209 | Nucleosome assembly protein 1-like 1                | NP1L1 | ENSG00000187109 |   | 12 |                 | 45.346  | 1.81 | 1.83 | 1.77E-04 |
| P06748 | Nucleophosmin                                       | NPM   | ENSG00000181163 |   | 5  |                 | 32.555  | 1.50 | 1.69 | 2.98E-04 |
| P61970 | Nuclear transport factor 2                          | NTF2  | ENSG00000102898 |   | 16 | GO:0008150, GO: | 14.469  | 0.31 | 0.33 | 5.42E-05 |

|        |                                            |       |                 |                  |    |                 |         |      |      |          |
|--------|--------------------------------------------|-------|-----------------|------------------|----|-----------------|---------|------|------|----------|
| P19338 | Nucleolin                                  | NUCL  | ENSG00000115053 |                  | 2  | GO:0008150, GO: | 76.568  | 0.51 | 0.55 | 6.86E-04 |
| P04181 | Ornithine aminotransferase, mitochondrial  | OAT   | ENSG00000065154 |                  | 10 | GO:0008150, GO: | 48.504  | 0.52 | 0.59 | 2.03E-05 |
| P39656 | Dolichyl-diphosphooligosaccharide--protein | OST48 | ENSG00000244038 |                  | 1  |                 | 50.769  | 1.38 | 0.51 | 3.46E-05 |
| Q32P28 | Prolyl 3-hydroxylase 1                     | P3H1  | ENSG00000117385 |                  | 1  |                 | 83.341  | 0.40 | 0.90 | 6.69E-05 |
| P13674 | Prolyl 4-hydroxylase subunit alpha-1       | P4HA1 | ENSG00000122884 |                  | 10 |                 | 61.011  | 0.61 | 0.29 | 1.17E-04 |
| Q9UQ80 | Proliferation-associated protein 2G4       | PA2G4 | ENSG00000170515 |                  | 12 |                 | 43.759  | 0.97 | 1.49 | 1.04E-04 |
| P05120 | Plasminogen activator inhibitor 2          | PAI2  | ENSG00000197632 |                  | 18 | GO:0008150, GO: | 46.566  | 0.71 | 0.94 | 2.36E-04 |
| Q99497 | Protein/nucleic acid deglycase DJ-1        | PARK7 | ENSG00000116288 |                  | 1  | GO:0006461, GO: | 19.878  | 0.64 | 0.95 | 2.60E-04 |
| P49023 | Paxillin                                   | PAXI  | ENSG00000089159 |                  | 12 |                 | 64.464  | 2.26 | 0.80 | 4.25E-05 |
| Q15365 | Poly-binding protein 1                     | PCBP1 | ENSG00000169564 |                  | 2  |                 | 37.474  | 5.37 | 0.80 | 7.42E-05 |
| P07237 | Protein disulfide-isomerase                | PDIA1 | ENSG00000185624 |                  | 17 | GO:0022607, GO: | 57.081  | 1.87 | 1.88 | 9.38E-05 |
| P30101 | Protein disulfide-isomerase A3             | PDIA3 | ENSG00000167004 |                  | 15 | GO:0005576, GO: | 56.747  | 0.60 | 0.70 | 1.88E-04 |
| P13667 | Protein disulfide-isomerase A4             | PDIA4 | ENSG00000155660 |                  | 7  | GO:0008150, GO: | 72.887  | 0.29 | 0.44 | 3.66E-05 |
| Q15084 | Protein disulfide-isomerase A6             | PDIA6 | ENSG00000143870 |                  | 2  |                 | 48.091  | 0.88 | 1.05 | 2.33E-05 |
| Q15121 | Astrocytic phosphoprotein PEA-15           | PEA15 | ENSG00000162734 |                  | 1  |                 | 15.031  | 0.29 | 0.32 | 1.14E-04 |
| P30086 | Phosphatidylethanolamine-binding protein   | PEBP1 | ENSG00000089220 |                  | 12 | GO:0008150, GO: | 21.044  | 0.74 | 0.54 | 1.50E-05 |
| Q01813 | ATP-dependent 6-phosphofructokinase, p     | PFKAP | ENSG00000067057 |                  | 10 |                 | 85.542  | 1.13 | 0.60 | 4.40E-05 |
| P18669 | Phosphoglycerate mutase 1                  | PGAM1 | ENSG00000171314 |                  | 10 | GO:0019748, GO: | 28.786  | 1.61 | 1.74 | 2.80E-04 |
| P00558 | Phosphoglycerate kinase 1                  | PGK1  | ENSG00000102144 | X                |    |                 | 44.586  | 0.87 | 0.90 | 1.57E-04 |
| P36871 | Phosphoglucomutase-1                       | PGM1  | ENSG00000079739 |                  | 1  | GO:0008150, GO: | 61.411  | 1.59 | 0.81 | 7.81E-05 |
| O00264 | Membrane-associated progesterone recep     | PGRC1 | ENSG00000101856 | X                |    | GO:0008150, GO: | 21.658  | 0.83 | 1.10 | 2.48E-04 |
| P35232 | Prohibitin                                 | PHB   | ENSG00000167085 |                  | 17 |                 | 29.786  | 0.60 | 0.30 | 3.17E-05 |
| Q99623 | Prohibitin-2                               | PHB2  | ENSG00000215021 |                  | 12 |                 | 33.276  | 0.42 | 0.63 | 7.20E-05 |
| Q9NRX4 | 14 kDa phosphohistidine phosphatase        | PHP14 | ENSG00000054148 |                  | 9  |                 | 13.824  | 0.97 | 0.45 | 1.25E-04 |
| Q15149 | Plectin                                    | PLEC  | ENSG00000178209 |                  | 8  |                 | 531.466 | 0.20 | 0.40 | 2.05E-04 |
| O60664 | Perilipin-3                                | PLIN3 | ENSG00000105355 |                  | 19 |                 | 47.046  | 0.68 | 0.46 | 2.70E-04 |
| O00469 | Procollagen-lysine,2-oxoglutarate 5-dioxyg | PLOD2 | ENSG00000152952 |                  | 3  | GO:0008150, GO: | 84.632  | 0.60 | 0.33 | 1.57E-04 |
| P13797 | Plastin-3                                  | PLST  | ENSG00000102024 | X                |    |                 | 70.766  | 0.94 | 1.18 | 6.69E-05 |
| P62937 | Peptidyl-prolyl cis-trans isomerase A      | PPIA  | ENSG00000196262 |                  | 7  | GO:0040011, GO: | 18.001  | 0.62 | 0.61 | 2.36E-04 |
| P23284 | Peptidyl-prolyl cis-trans isomerase B      | PPIB  | ENSG00000166794 |                  | 15 | GO:0008150, GO: | 23.728  | 0.55 | 0.54 | 3.15E-04 |
| O75915 | PRA1 family protein 3                      | PRAF3 | ENSG00000144746 |                  | 3  | GO:0008150, GO: | 21.600  | 1.45 | 1.20 | 1.21E-04 |
| Q06830 | Peroxiredoxin-1                            | PRDX1 | ENSG00000117450 |                  | 1  | GO:0008283, GO: | 22.096  | 1.17 | 0.71 | 1.50E-04 |
| P32119 | Peroxiredoxin-2                            | PRDX2 | ENSG00000167815 |                  | 19 | GO:0008150, GO: | 21.878  | 0.89 | 0.53 | 2.52E-04 |
| P30041 | Peroxiredoxin-6                            | PRDX6 | ENSG00000117592 |                  | 1  | GO:0008150, GO: | 25.019  | 0.80 | 0.82 | 2.09E-04 |
| P78527 | DNA-dependent protein kinase catalytic su  | PRKDC | ENSG00000253729 |                  | 8  |                 | 468.788 | 2.67 | 1.06 | 7.53E-04 |
| P07737 | Profilin-1                                 | PROF1 | ENSG00000108518 |                  | 17 | GO:0009790, GO: | 15.045  | 0.62 | 0.95 | 5.19E-05 |
| P17980 | 26S proteasome regulatory subunit 6A       | PRS6A | ENSG00000165916 |                  | 11 | GO:0016887, GO: | 49.172  | 0.48 | 2.39 | 1.38E-04 |
| P43686 | 26S proteasome regulatory subunit 6B       | PRS6B | ENSG00000281221 | CHR_HG2021_PATCH |    |                 | 47.337  | 1.45 | 2.99 | 5.50E-05 |
| P35998 | 26S proteasome regulatory subunit 7        | PRS7  | ENSG00000161057 |                  | 7  |                 | 48.603  | 1.17 | 1.54 | 3.22E-05 |
| P62195 | 26S proteasome regulatory subunit 8        | PRS8  | ENSG00000087191 |                  | 17 |                 | 45.597  | 0.48 | 0.30 | 2.12E-05 |
| P55786 | Puromycin-sensitive aminopeptidase         | PSA   | ENSG00000141279 |                  | 17 |                 | 103.211 | 1.07 | 0.80 | 0.00E+00 |
| O14818 | Proteasome subunit alpha type-7            | PSA7  | ENSG00000101182 |                  | 20 |                 | 27.870  | 0.35 | 0.21 | 3.74E-05 |
| P20618 | Proteasome subunit beta type-1             | PSB1  | ENSG00000281184 | CHR_HSCHR6_      |    | GO:0009056, GO: | 26.472  | 0.57 | 0.42 | 3.28E-05 |
| Q9UNM6 | 26S proteasome non-ATPase regulatory s     | PSD13 | ENSG00000185627 |                  | 11 |                 | 42.918  | 2.13 | 1.91 | 1.57E-05 |

|        |                                          |       |                 |             |    |                 |         |      |      |          |
|--------|------------------------------------------|-------|-----------------|-------------|----|-----------------|---------|------|------|----------|
| Q13200 | 26S proteasome non-ATPase regulatory s   | PSMD2 | ENSG00000175166 |             | 3  | GO:0009056, GO: | 100.136 | 2.19 | 1.37 | 2.46E-04 |
| Q06323 | Proteasome activator complex subunit 1   | PSME1 | ENSG00000092010 |             | 14 |                 | 28.705  | 0.38 | 0.12 | 9.38E-05 |
| Q9UL46 | Proteasome activator complex subunit 2   | PSME2 | ENSG00000100911 |             | 14 | GO:0009056, GO: | 27.384  | 0.74 | 0.83 | 2.70E-04 |
| P26599 | Polypyrimidine tract-binding protein 1   | PTBP1 | ENSG00000011304 |             | 19 |                 | 57.186  | 0.64 | 0.70 | 2.63E-05 |
| Q16647 | Prostacyclin synthase                    | PTGIS | ENSG00000124212 |             | 20 | GO:0048856, GO: | 57.068  | 0.66 | 0.36 | 2.36E-04 |
| P06454 | Prothymosin alpha                        | PTMA  | ENSG00000187514 |             | 2  |                 | 12.196  | 1.00 | 0.74 | 9.38E-05 |
| P20962 | Parathymosin                             | PTMS  | ENSG00000159335 |             | 12 | GO:0005634, GO: | 11.523  | 0.55 | 0.34 | 1.14E-04 |
| P61026 | Ras-related protein Rab-10               | RAB10 | ENSG00000084733 |             | 2  | GO:0008283, GO: | 22.527  | 1.01 | 2.30 | 5.97E-03 |
| P62820 | Ras-related protein Rab-1A               | RAB1A | ENSG00000138069 |             | 2  |                 | 22.663  | 0.60 | 0.44 | 1.75E-03 |
| P61019 | Ras-related protein Rab-2A               | RAB2A | ENSG00000104388 |             | 8  |                 | 23.531  | 1.19 | 1.88 | 9.87E-05 |
| P51148 | Ras-related protein Rab-5C               | RAB5C | ENSG00000108774 |             | 17 |                 | 23.468  | 1.34 | 0.41 | 6.30E-06 |
| P51149 | Ras-related protein Rab-7a               | RAB7A | ENSG00000075785 |             | 3  | GO:0009056, GO: | 23.475  | 0.85 | 0.90 | 6.17E-05 |
| P63244 | Receptor of activated protein C kinase 1 | RACK1 | ENSG00000204628 |             | 5  | GO:0009790, GO: | 35.055  | 2.66 | 1.44 | 1.10E-04 |
| P62826 | GTP-binding nuclear protein Ran          | RAN   | ENSG00000132341 |             | 12 | GO:0007010, GO: | 24.408  | 1.57 | 2.24 | 5.67E-04 |
| P61224 | Ras-related protein Rap-1b               | RAP1B | ENSG00000127314 |             | 12 |                 | 20.812  | 7.98 | 1.20 | 2.36E-04 |
| P62491 | Ras-related protein Rab-11A              | RB11A | ENSG00000103769 |             | 15 | GO:0007010, GO: | 24.378  | 0.73 | 0.90 | 3.78E-04 |
| Q15293 | Reticulocalbin-1                         | RCN1  | ENSG00000049449 |             | 11 | GO:0009790, GO: | 38.866  | 0.42 | 0.64 | 5.50E-05 |
| P54727 | UV excision repair protein RAD23 homolog | RD23B | ENSG00000119318 |             | 9  |                 | 43.145  | 0.73 | 0.90 | 1.01E-03 |
| Q07960 | Rho GTPase-activating protein 1          | RHG01 | ENSG00000175220 |             | 11 | GO:0008150, GO: | 50.404  | 1.13 | 3.39 | 0.00E+00 |
| P13489 | Ribonuclease inhibitor                   | RINI  | ENSG00000276230 | CHR_HSCHR11 |    | GO:0008150, GO: | 49.941  | 0.67 | 0.55 | 2.79E-05 |
| P27635 | 60S ribosomal protein L10                | RL10  | ENSG00000147403 | X           |    | GO:0009056, GO: | 24.588  | 3.91 | 3.54 | 6.24E-05 |
| P62906 | 60S ribosomal protein L10a               | RL10A | ENSG00000198755 |             | 6  | GO:0008150, GO: | 24.816  | 1.22 | 2.45 | 4.06E-05 |
| P62913 | 60S ribosomal protein L11                | RL11  | ENSG00000142676 |             | 1  | GO:0009056, GO: | 20.240  | 0.52 | 1.16 | 2.22E-04 |
| P30050 | 60S ribosomal protein L12                | RL12  | ENSG00000197958 |             | 9  | GO:0009056, GO: | 17.808  | 0.71 | 1.75 | 1.71E-04 |
| P26373 | 60S ribosomal protein L13                | RL13  | ENSG00000167526 |             | 16 | GO:0008150, GO: | 24.247  | 1.16 | 1.00 | 1.98E-04 |
| P50914 | 60S ribosomal protein L14                | RL14  | ENSG00000188846 |             | 3  | GO:0008150, GO: | 23.417  | 1.45 | 0.30 | 3.69E-04 |
| P61313 | 60S ribosomal protein L15                | RL15  | ENSG00000174748 |             | 3  | GO:0008150, GO: | 24.131  | 1.97 | 1.75 | 5.85E-05 |
| P18621 | 60S ribosomal protein L17                | RL17  | ENSG00000265681 |             | 18 |                 | 21.383  | 0.64 | 0.80 | 1.71E-04 |
| Q07020 | 60S ribosomal protein L18                | RL18  | ENSG00000063177 |             | 19 |                 | 21.621  | 2.20 | 1.48 | 1.45E-04 |
| Q02543 | 60S ribosomal protein L18a               | RL18A | ENSG00000105640 |             | 19 | GO:0008150, GO: | 20.749  | 1.06 | 0.48 | 1.45E-04 |
| P84098 | 60S ribosomal protein L19                | RL19  | ENSG00000108298 |             | 17 | GO:0008150, GO: | 23.451  | 0.32 | 0.95 | 1.94E-05 |
| P46778 | 60S ribosomal protein L21                | RL21  | ENSG00000122026 |             | 13 | GO:0008150, GO: | 18.553  | 1.13 | 3.06 | 6.86E-04 |
| P35268 | 60S ribosomal protein L22                | RL22  | ENSG00000116251 |             | 1  | GO:0009056, GO: | 14.778  | 0.36 | 1.20 | 6.74E-04 |
| P62829 | 60S ribosomal protein L23                | RL23  | ENSG00000125691 |             | 17 | GO:0008283, GO: | 14.856  | 1.11 | 2.73 | 3.02E-04 |
| P62750 | 60S ribosomal protein L23a               | RL23A | ENSG00000198242 |             | 17 | GO:0008283, GO: | 17.684  | 1.02 | 0.88 | 1.78E-04 |
| P83731 | 60S ribosomal protein L24                | RL24  | ENSG00000114391 |             | 3  | GO:0009056, GO: | 17.768  | 1.00 | 1.22 | 5.97E-04 |
| P61254 | 60S ribosomal protein L26                | RL26  | ENSG00000161970 |             | 17 |                 | 17.248  | 0.44 | 0.14 | 1.67E-04 |
| P46776 | 60S ribosomal protein L27a               | RL27A | ENSG00000166441 |             | 11 | GO:0008150, GO: | 16.551  | 1.08 | 1.66 | 0.00E+00 |
| P46779 | 60S ribosomal protein L28                | RL28  | ENSG00000108107 |             | 19 |                 | 15.738  | 0.26 | 0.22 | 2.46E-04 |
| P39023 | 60S ribosomal protein L3                 | RL3   | ENSG00000100316 |             | 22 | GO:0009056, GO: | 46.080  | 0.78 | 0.52 | 3.22E-05 |
| P62899 | 60S ribosomal protein L31                | RL31  | ENSG00000071082 |             | 2  |                 | 14.454  | 0.12 | 0.46 | 3.90E-04 |
| P62910 | 60S ribosomal protein L32                | RL32  | ENSG00000144713 |             | 3  | GO:0008150, GO: | 15.850  | 0.69 | 1.02 | 1.00E-04 |
| Q9Y3U8 | 60S ribosomal protein L36                | RL36  | ENSG00000130255 |             | 19 | GO:0008150, GO: | 12.246  | 0.79 | 0.41 | 1.08E-03 |
| P36578 | 60S ribosomal protein L4                 | RL4   | ENSG00000174444 |             | 15 | GO:0008150, GO: | 47.667  | 1.55 | 1.75 | 2.26E-04 |



|        |                                            |       |                 |              |    |                 |         |      |      |          |
|--------|--------------------------------------------|-------|-----------------|--------------|----|-----------------|---------|------|------|----------|
| P46777 | 60S ribosomal protein L5                   | RL5   | ENSG00000122406 |              | 1  | GO:0009056, GO: | 34.341  | 1.38 | 0.95 | 1.17E-04 |
| Q02878 | 60S ribosomal protein L6                   | RL6   | ENSG00000089009 |              | 12 | GO:0009056, GO: | 32.708  | 0.95 | 1.45 | 7.34E-05 |
| P18124 | 60S ribosomal protein L7                   | RL7   | ENSG00000147604 |              | 8  | GO:0009056, GO: | 29.207  | 3.17 | 8.66 | 2.33E-05 |
| P62424 | 60S ribosomal protein L7a                  | RL7A  | ENSG00000280858 | CHR_HG2030_F |    | GO:0008150, GO: | 29.977  | 0.94 | 1.15 | 4.15E-05 |
| P62917 | 60S ribosomal protein L8                   | RL8   | ENSG00000161016 |              | 8  | GO:0008150, GO: | 28.007  | 0.46 | 0.61 | 3.48E-04 |
| P05388 | 60S acidic ribosomal protein P0            | RLA0  | ENSG00000089157 |              | 12 |                 | 34.252  | 0.24 | 0.39 | 1.45E-04 |
| P05386 | 60S acidic ribosomal protein P1            | RLA1  | ENSG00000137818 |              | 15 | GO:0008150, GO: | 11.507  | 0.86 | 1.52 | 6.79E-03 |
| P05387 | 60S acidic ribosomal protein P2            | RLA2  | ENSG00000177600 |              | 11 | GO:0008150, GO: | 11.658  | 1.73 | 1.55 | 1.57E-04 |
| Q13151 | Heterogeneous nuclear ribonucleoprotein    | ROA0  | ENSG00000177733 |              | 5  | GO:0008150, GO: | 30.822  | 3.87 | 0.90 | 1.21E-04 |
| P09651 | Heterogeneous nuclear ribonucleoprotein    | ROA1  | ENSG00000135486 |              | 12 |                 | 38.723  | 0.65 | 0.76 | 0.00E+00 |
| P22626 | Heterogeneous nuclear ribonucleoproteins   | ROA2  | ENSG00000122566 |              | 7  |                 | 37.407  | 0.73 | 0.56 | 1.50E-04 |
| P51991 | Heterogeneous nuclear ribonucleoprotein    | ROA3  | ENSG00000170144 |              | 2  |                 | 39.571  | 1.06 | 0.72 | 7.34E-05 |
| P04843 | Dolichyl-diphosphooligosaccharide--protein | RPN1  | ENSG00000163902 |              | 3  | GO:0008150, GO: | 68.527  | 1.10 | 0.87 | 9.87E-05 |
| Q9P2E9 | Ribosome-binding protein 1                 | RRBP1 | ENSG00000125844 |              | 20 | GO:0008150, GO: | 152.365 | 1.07 | 0.96 | 8.39E-05 |
| P46783 | 40S ribosomal protein S10                  | RS10  | ENSG00000124614 |              | 6  | GO:0009056, GO: | 18.886  | 1.21 | 1.77 | 8.96E-04 |
| P62280 | 40S ribosomal protein S11                  | RS11  | ENSG00000142534 |              | 19 | GO:0009056, GO: | 18.419  | 1.06 | 0.65 | 9.38E-05 |
| P25398 | 40S ribosomal protein S12                  | RS12  | ENSG00000112306 |              | 6  | GO:0008150, GO: | 14.505  | 0.82 | 0.68 | 4.06E-05 |
| P62277 | 40S ribosomal protein S13                  | RS13  | ENSG00000110700 |              | 11 | GO:0009056, GO: | 17.212  | 1.62 | 1.96 | 1.53E-04 |
| P62263 | 40S ribosomal protein S14                  | RS14  | ENSG00000164587 |              | 5  | GO:0009056, GO: | 16.263  | 1.42 | 1.20 | 2.70E-04 |
| P62841 | 40S ribosomal protein S15                  | RS15  | ENSG00000115268 |              | 19 | GO:0009056, GO: | 17.029  | 1.28 | 1.79 | 3.87E-04 |
| P62249 | 40S ribosomal protein S16                  | RS16  | ENSG00000105193 |              | 19 | GO:0008150, GO: | 16.435  | 2.12 | 3.74 | 4.92E-05 |
| P62269 | 40S ribosomal protein S18                  | RS18  | ENSG00000226225 | CHR_HSCHR6_I |    | GO:0009056, GO: | 17.708  | 0.79 | 2.35 | 1.92E-03 |
| P39019 | 40S ribosomal protein S19                  | RS19  | ENSG00000105372 |              | 19 | GO:0040011, GO: | 16.051  | 0.69 | 1.14 | 7.80E-06 |
| P15880 | 40S ribosomal protein S2                   | RS2   | ENSG00000140988 |              | 16 | GO:0009056, GO: | 31.305  | 1.02 | 1.00 | 1.92E-05 |
| P63220 | 40S ribosomal protein S21                  | RS21  | ENSG00000171858 |              | 20 | GO:0008150, GO: | 9.106   | 1.29 | 0.76 | 3.06E-05 |
| P62266 | 40S ribosomal protein S23                  | RS23  | ENSG00000186468 |              | 5  | GO:0008150, GO: | 15.798  | 1.21 | 0.30 | 1.91E-03 |
| P62847 | 40S ribosomal protein S24                  | RS24  | ENSG00000138326 |              | 10 |                 | 15.413  | 2.73 | 5.33 | 8.15E-05 |
| P62851 | 40S ribosomal protein S25                  | RS25  | ENSG00000280831 | CHR_HG2217_F |    | GO:0008150, GO: | 13.734  | 1.59 | 0.75 | 1.25E-04 |
| P42677 | 40S ribosomal protein S27                  | RS27  | ENSG00000177954 |              | 1  |                 | 9.455   | 2.93 | 2.58 | 1.15E-05 |
| P62857 | 40S ribosomal protein S28                  | RS28  | ENSG00000233927 |              | 19 | GO:0009056, GO: | 7.836   | 0.94 | 1.43 | 1.17E-04 |
| P23396 | 40S ribosomal protein S3                   | RS3   | ENSG00000149273 |              | 11 |                 | 26.671  | 1.34 | 0.88 | 4.21E-04 |
| P61247 | 40S ribosomal protein S3a                  | RS3A  | ENSG00000145425 |              | 4  | GO:0009056, GO: | 29.926  | 0.87 | 1.46 | 2.06E-04 |
| P62701 | 40S ribosomal protein S4, X isoform        | RS4X  | ENSG00000198034 | X            |    | GO:0008283, GO: | 29.579  | 0.40 | 1.49 | 1.21E-04 |
| P46782 | 40S ribosomal protein S5                   | RS5   | ENSG00000083845 |              | 19 | GO:0009056, GO: | 22.862  | 2.28 | 2.36 | 4.96E-04 |
| P62753 | 40S ribosomal protein S6                   | RS6   | ENSG00000137154 |              | 9  | GO:0009056, GO: | 28.663  | 0.52 | 0.93 | 3.59E-05 |
| P62081 | 40S ribosomal protein S7                   | RS7   | ENSG00000171863 |              | 2  | GO:0009790, GO: | 22.113  | 0.39 | 0.91 | 4.67E-05 |
| P62241 | 40S ribosomal protein S8                   | RS8   | ENSG00000142937 |              | 1  | GO:0009056, GO: | 24.190  | 0.44 | 0.54 | 7.07E-04 |
| P46781 | 40S ribosomal protein S9                   | RS9   | ENSG00000278081 | CHR_HSCHR19I |    | GO:0008283, GO: | 22.578  | 2.93 | 3.45 | 3.26E-04 |
| P08865 | 40S ribosomal protein SA                   | RSSA  | ENSG00000168028 |              | 3  | GO:0009056, GO: | 32.833  | 1.10 | 1.21 | 8.52E-05 |
| Q9Y310 | tRNA-splicing ligase RtcB homolog          | RTCB  | ENSG00000100220 |              | 22 | GO:0009790, GO: | 55.175  | 1.50 | 1.59 | 6.30E-04 |
| P06703 | Protein S100-A6                            | S10A6 | ENSG00000197956 |              | 1  | GO:0008283, GO: | 10.173  | 0.55 | 1.20 | 1.14E-04 |
| P60903 | Protein S100-A10                           | S10AA | ENSG00000197747 |              | 1  | GO:0008150, GO: | 11.196  | 1.06 | 1.13 | 5.34E-05 |
| P31949 | Protein S100-A11                           | S10AB | ENSG00000163191 |              | 1  | GO:0008283, GO: | 11.733  | 1.15 | 0.66 | 2.22E-04 |
| Q99584 | Protein S100-A13                           | S10AD | ENSG00000189171 |              | 1  | GO:0008283, GO: | 11.464  | 2.90 | 1.20 | 5.30E-04 |

|        |                                                     |       |                 |              |    |                 |         |      |      |          |
|--------|-----------------------------------------------------|-------|-----------------|--------------|----|-----------------|---------|------|------|----------|
| Q96FQ6 | Protein S100-A16                                    | S10AG | ENSG00000188643 |              | 1  | GO:0008150, GO: | 11.794  | 3.34 | 4.75 | 2.26E-04 |
| P23526 | Adenosylhomocysteinase                              | SAHH  | ENSG00000101444 |              | 20 | GO:0008150, GO: | 47.685  | 0.63 | 0.72 | 3.29E-04 |
| O75396 | Vesicle-trafficking protein SEC22b                  | SC22B | ENSG00000265808 |              | 1  | GO:0008150, GO: | 24.578  | 1.26 | 0.91 | 1.04E-04 |
| Q15436 | Protein transport protein Sec23A                    | SC23A | ENSG00000100934 |              | 14 |                 | 86.105  | 0.30 | 0.22 | 1.75E-03 |
| O94979 | Protein transport protein Sec31A                    | SC31A | ENSG00000138674 |              | 4  |                 | 132.931 | 1.10 | 2.74 | 2.02E-04 |
| Q12765 | Secernin-1                                          | SCRN1 | ENSG00000136193 |              | 7  |                 | 46.353  | 1.16 | 0.96 | 8.52E-05 |
| P55735 | Protein SEC13 homolog                               | SEC13 | ENSG00000157020 |              | 3  |                 | 35.518  | 0.69 | 0.34 | 1.71E-04 |
| Q12884 | Prolyl endopeptidase FAP                            | SEPR  | ENSG00000078098 |              | 2  | GO:0008283, GO: | 87.657  | 0.39 | 0.96 | 8.93E-05 |
| Q15019 | Septin-2                                            | SEPT2 |                 |              |    |                 | 41.461  | 1.05 | 2.15 | 9.07E-05 |
| Q16181 | Septin-7                                            | SEPT7 |                 |              |    |                 | 50.648  | 0.75 | 0.29 | 1.34E-04 |
| O43175 | D-3-phosphoglycerate dehydrogenase                  | SERA  | ENSG00000092621 |              | 1  | GO:0009790, GO: | 56.614  | 2.84 | 0.85 | 5.34E-05 |
| P50454 | Serpin H1                                           | SERPH | ENSG00000149257 |              | 11 | GO:0008150, GO: | 46.411  | 0.92 | 1.33 | 2.43E-04 |
| P0DME0 | Protein SETSIP                                      | SETLP | ENSG00000230667 |              | 1  |                 | 34.861  | 0.48 | 0.40 | 3.70E-05 |
| P23246 | Splicing factor, proline- and glutamine-rich        | SFPQ  | ENSG00000116560 |              | 1  | GO:0006464, GO: | 76.102  | 0.77 | 0.85 | 4.73E-04 |
| O75368 | SH3 domain-binding glutamic acid-rich-like          | SH3L1 | ENSG00000131171 | X            |    | GO:0005634, GO: | 12.766  | 0.52 | 0.43 | 2.60E-04 |
| Q9H299 | SH3 domain-binding glutamic acid-rich-like          | SH3L3 | ENSG00000142669 |              | 1  | GO:0008150, GO: | 10.431  | 3.79 | 3.04 | 1.43E-04 |
| P63208 | S-phase kinase-associated protein 1                 | SKP1  | ENSG00000113558 |              | 5  | GO:0006461, GO: | 18.646  | 0.40 | 0.40 | 2.70E-04 |
| Q7KZF4 | Staphylococcal nuclease domain-containing           | SND1  | ENSG00000197157 |              | 7  | GO:0008150, GO: | 101.934 | 1.80 | 1.01 | 1.88E-04 |
| P04179 | Superoxide dismutase [Mn], mitochondrial            | SODM  | ENSG00000112096 |              | 6  |                 | 24.735  | 1.09 | 1.31 | 3.18E-05 |
| Q01082 | Spectrin beta chain, non-erythrocytic 1             | SPTB2 | ENSG00000115306 |              | 2  | GO:0007010, GO: | 274.439 | 1.92 | 0.67 | 2.13E-04 |
| Q13813 | Spectrin alpha chain, non-erythrocytic 1            | SPTN1 | ENSG00000197694 |              | 9  |                 | 284.364 | 1.50 | 0.71 | 1.28E-05 |
| Q14247 | Src substrate cortactin                             | SRC8  | ENSG00000085733 |              | 11 |                 | 61.549  | 1.62 | 0.33 | 2.60E-04 |
| Q01130 | Serine/arginine-rich splicing factor 2              | SRSF2 | ENSG00000161547 |              | 17 |                 | 25.461  | 0.82 | 0.84 | 2.14E-05 |
| P84103 | Serine/arginine-rich splicing factor 3              | SRSF3 | ENSG00000112081 |              | 6  |                 | 19.318  | 0.41 | 0.71 | 3.46E-05 |
| Q04837 | Single-stranded DNA-binding protein, mitochondrial  | SSBP  | ENSG00000262771 | CHR_HSCHR7_1 |    | GO:0008150, GO: | 17.249  | 0.68 | 1.14 | 1.38E-04 |
| P43307 | Translocon-associated protein subunit alpha         | SSRA  | ENSG00000124783 |              | 6  | GO:0008283, GO: | 32.215  | 2.81 | 3.24 | 1.57E-04 |
| P42224 | Signal transducer and activator of transcription 1  | STAT1 | ENSG00000115415 |              | 2  | GO:0008283, GO: | 87.280  | 1.32 | 1.84 | 4.11E-04 |
| P31948 | Stress-induced-phosphoprotein 1                     | STIP1 | ENSG00000168439 |              | 11 |                 | 62.599  | 0.36 | 0.76 | 9.38E-05 |
| P16949 | Stathmin                                            | STMN1 | ENSG00000117632 |              | 1  |                 | 17.292  | 1.10 | 1.06 | 1.03E-03 |
| Q86Y82 | Syntaxin-12                                         | STX12 | ENSG00000117758 |              | 1  | GO:0061024, GO: | 31.622  | 0.36 | 0.30 | 1.10E-04 |
| O15400 | Syntaxin-7                                          | STX7  | ENSG00000079950 |              | 6  |                 | 29.797  | 0.97 | 0.80 | 2.19E-04 |
| O43776 | Asparagine--tRNA ligase, cytoplasmic                | SYNC  | ENSG00000134440 |              | 18 | GO:0008150, GO: | 62.903  | 1.45 | 1.32 | 7.49E-05 |
| P26639 | Threonine--tRNA ligase, cytoplasmic                 | SYTC  | ENSG00000113407 |              | 5  |                 | 83.382  | 1.44 | 2.71 | 1.78E-05 |
| P23381 | Tryptophan--tRNA ligase, cytoplasmic                | SYWC  | ENSG00000140105 |              | 14 | GO:0008283, GO: | 53.132  | 1.01 | 0.66 | 3.44E-04 |
| Q01995 | Transgelin                                          | TAGL  | ENSG00000149591 |              | 11 | GO:0008150, GO: | 22.596  | 3.02 | 3.85 | 4.92E-05 |
| P37802 | Transgelin-2                                        | TAGL2 | ENSG00000158710 |              | 1  |                 | 22.377  | 2.44 | 1.23 | 3.59E-05 |
| P37837 | Transaldolase                                       | TALDO | ENSG00000177156 |              | 11 | GO:0008150, GO: | 37.516  | 0.81 | 1.08 | 1.39E-04 |
| P0DPH7 | Tubulin alpha-3C chain                              | TBA3C | ENSG00000198033 |              | 13 |                 | 49.928  | 1.37 | 0.56 | 1.10E-04 |
| Q13885 | Tubulin beta-2A chain                               | TBB2A | ENSG00000137267 |              | 6  |                 | 49.875  | 0.99 | 0.83 | 9.87E-05 |
| P68371 | Tubulin beta-4B chain                               | TBB4B | ENSG00000188229 |              | 9  | GO:0007010, GO: | 49.799  | 0.84 | 0.74 | 1.79E-04 |
| P07437 | Tubulin beta chain                                  | TBB5  | ENSG00000232575 | CHR_HSCHR6_1 |    | GO:0007010, GO: | 49.639  | 1.21 | 1.25 | 1.25E-04 |
| Q9BUF5 | Tubulin beta-6 chain                                | TBB6  | ENSG00000176014 |              | 18 | GO:0008150, GO: | 49.825  | 0.72 | 0.89 | 2.20E-04 |
| P53999 | Activated RNA polymerase II transcription factor II | TCP4  | ENSG00000113387 |              | 5  | GO:0008150, GO: | 14.386  | 1.14 | 0.43 | 1.61E-04 |
| P17987 | T-complex protein 1 subunit alpha                   | TCPA  | ENSG00000120438 |              | 6  | GO:0006461, GO: | 60.306  | 1.93 | 5.72 | 2.83E-04 |

|        |                                                 |       |                 |   |    |                 |         |      |      |          |
|--------|-------------------------------------------------|-------|-----------------|---|----|-----------------|---------|------|------|----------|
| P78371 | T-complex protein 1 subunit beta                | TCPB  | ENSG00000166226 |   | 12 |                 | 57.452  | 0.76 | 1.17 | 1.37E-04 |
| P50991 | T-complex protein 1 subunit delta               | TCPD  | ENSG00000115484 |   | 2  |                 | 57.888  | 2.31 | 3.33 | 3.11E-05 |
| P48643 | T-complex protein 1 subunit epsilon             | TCPE  | ENSG00000150753 |   | 5  | GO:0043167, GO: | 59.633  | 1.80 | 3.59 | 7.81E-05 |
| P49368 | T-complex protein 1 subunit gamma               | TCPG  | ENSG00000163468 |   | 1  | GO:0006461, GO: | 60.495  | 1.30 | 1.01 | 6.01E-04 |
| Q99832 | T-complex protein 1 subunit eta                 | TCPH  | ENSG00000135624 |   | 2  | GO:0008150, GO: | 59.329  | 1.13 | 1.13 | 1.16E-05 |
| P50990 | T-complex protein 1 subunit theta               | TCPQ  | ENSG00000156261 |   | 21 | GO:0016887, GO: | 59.583  | 0.73 | 0.99 | 4.15E-05 |
| P40227 | T-complex protein 1 subunit zeta                | TCPZ  | ENSG00000146731 |   | 7  |                 | 57.988  | 0.90 | 1.83 | 4.45E-05 |
| P13693 | Translationally-controlled tumor protein        | TCTP  | ENSG00000133112 |   | 13 | GO:0043167, GO: | 19.583  | 0.75 | 1.17 | 1.07E-04 |
| Q15185 | Prostaglandin E synthase 3                      | TEBP  | ENSG00000110958 |   | 12 |                 | 18.685  | 0.35 | 0.87 | 1.50E-04 |
| P55072 | Transitional endoplasmic reticulum ATPase       | TERA  | ENSG00000165280 |   | 9  | GO:0016887, GO: | 89.266  | 1.16 | 1.22 | 1.62E-05 |
| P10599 | Thioredoxin                                     | THIO  | ENSG00000136810 |   | 9  |                 | 11.730  | 0.54 | 0.81 | 8.15E-05 |
| Q13263 | Transcription intermediary factor 1-beta        | TIF1B | ENSG00000130726 |   | 19 |                 | 88.493  | 2.90 | 2.39 | 2.87E-05 |
| P29401 | Transketolase                                   | TKT   | ENSG00000163931 |   | 3  |                 | 67.835  | 0.63 | 0.34 | 1.19E-05 |
| Q9Y490 | Talin-1                                         | TLN1  | ENSG00000137076 |   | 9  | GO:0007010, GO: | 269.599 | 0.84 | 0.85 | 1.64E-04 |
| P49755 | Transmembrane emp24 domain-containing protein 1 | TMEDA | ENSG00000170348 |   | 14 | GO:0008150, GO: | 24.960  | 2.00 | 0.75 | 1.71E-04 |
| O60784 | Target of Myb protein 1                         | TOM1  | ENSG00000100284 |   | 22 |                 | 53.785  | 1.27 | 0.22 | 2.55E-04 |
| P60174 | Triosephosphate isomerase                       | TPIS  | ENSG00000111669 |   | 12 |                 | 30.772  | 0.61 | 0.56 | 6.93E-05 |
| P07951 | Tropomyosin beta chain                          | TPM2  | ENSG00000198467 |   | 9  |                 | 32.831  | 1.89 | 1.31 | 8.71E-04 |
| P06753 | Tropomyosin alpha-3 chain                       | TPM3  | ENSG00000143549 |   | 1  |                 | 32.930  | 2.16 | 1.28 | 6.30E-04 |
| P67936 | Tropomyosin alpha-4 chain                       | TPM4  | ENSG00000167460 |   | 19 | GO:0008150, GO: | 28.504  | 1.33 | 0.51 | 1.58E-05 |
| Q16881 | Thioredoxin reductase 1, cytoplasmic            | TRXR1 | ENSG00000198431 |   | 12 | GO:0008150, GO: | 70.862  | 2.76 | 3.86 | 4.96E-05 |
| P07996 | Thrombospondin-1                                | TSP1  | ENSG00000137801 |   | 15 | GO:0008283, GO: | 129.300 | 3.95 | 6.58 | 3.40E-05 |
| Q8NBS9 | Thioredoxin domain-containing protein 5         | TXND5 | ENSG00000239264 |   | 6  |                 | 47.599  | 0.88 | 1.74 | 1.95E-03 |
| P63313 | Thymosin beta-10                                | TYB10 | ENSG00000034510 |   | 2  | GO:0005623, GO: | 5.023   | 0.82 | 0.46 | 5.01E-04 |
| P62328 | Thymosin beta-4                                 | TYB4  | ENSG00000205542 | X |    | GO:0007010, GO: | 5.050   | 0.63 | 0.38 | 1.50E-04 |
| P22314 | Ubiquitin-like modifier-activating enzyme 1     | UBA1  | ENSG00000130985 | X |    |                 | 117.774 | 0.97 | 1.13 | 1.85E-04 |
| P0CG47 | Polyubiquitin-B                                 | UBB   | ENSG00000170315 |   | 17 |                 | 25.746  | 1.02 | 0.73 | 4.79E-05 |
| P61088 | Ubiquitin-conjugating enzyme E2 N               | UBE2N | ENSG00000177889 |   | 12 | GO:0043167, GO: | 17.127  | 1.83 | 1.59 | 4.56E-05 |
| P09936 | Ubiquitin carboxyl-terminal hydrolase isoform 1 | UCHL1 | ENSG00000154277 |   | 4  | GO:0008283, GO: | 24.808  | 1.50 | 1.11 | 1.54E-03 |
| O60701 | UDP-glucose 6-dehydrogenase                     | UGDH  | ENSG00000109814 |   | 4  |                 | 54.989  | 0.40 | 5.54 | 5.10E-04 |
| Q9NYU2 | UDP-glucose:glycoprotein glucosyltransferase 1  | UGGG1 | ENSG00000136731 |   | 2  |                 | 177.078 | 1.00 | 0.34 | 7.18E-04 |
| Q16851 | UTP--glucose-1-phosphate uridylyltransferase    | UGPA  | ENSG00000169764 |   | 2  |                 | 56.905  | 0.68 | 0.75 | 2.78E-05 |
| Q15836 | Vesicle-associated membrane protein 3           | VAMP3 | ENSG00000049245 |   | 1  | GO:0006461, GO: | 11.302  | 1.11 | 1.02 | 1.64E-05 |
| Q99536 | Synaptic vesicle membrane protein VAT-1         | VAT1  | ENSG00000108828 |   | 17 | GO:0008150, GO: | 41.893  | 1.40 | 1.15 | 9.87E-05 |
| Q00341 | Vigilin                                         | VIGLN | ENSG00000115677 |   | 2  |                 | 141.368 | 0.87 | 0.64 | 1.50E-05 |
| P08670 | Vimentin                                        | VIME  | ENSG00000026025 |   | 10 | GO:0008150, GO: | 53.619  | 0.98 | 2.61 | 2.75E-05 |
| P18206 | Vinculin                                        | VINC  | ENSG00000035403 |   | 10 |                 | 123.722 | 1.18 | 1.09 | 1.88E-05 |
| O75436 | Vacuolar protein sorting-associated protein 2   | VP26A | ENSG00000122958 |   | 10 | GO:0008150, GO: | 38.146  | 1.29 | 0.80 | 6.24E-05 |
| O75083 | WD repeat-containing protein 1                  | WDR1  | ENSG00000071127 |   | 4  | GO:0007010, GO: | 66.152  | 1.59 | 1.44 | 5.50E-05 |
| P13010 | X-ray repair cross-complementing protein 5      | XRCC5 | ENSG00000079246 |   | 2  | GO:0016887, GO: | 82.652  | 1.13 | 1.01 | 2.28E-05 |
| P12956 | X-ray repair cross-complementing protein 6      | XRCC6 | ENSG00000196419 |   | 22 |                 | 69.799  | 0.88 | 1.07 | 1.06E-04 |
| P67809 | Nuclease-sensitive element-binding protein 1    | YBOX1 | ENSG00000065978 |   | 1  | GO:0009790, GO: | 35.903  | 1.82 | 0.86 | 1.71E-04 |
| Q15942 | Zyxin                                           | ZYX   | ENSG00000159840 |   | 7  | GO:0008150, GO: | 61.238  | 1.17 | 0.97 | 1.10E-04 |
